# Supplementary material for: Age is associated with time in therapeutic range for warfarin therapy in patients with atrial fibrillation
Source: PubMed Central journal article supplement (PMC5342334; doi:10.18632/oncotarget.10944), 2016-07-29
Supplement: oncotarget-07-54194-s001.pdf [file oncotarget-07-54194-s001.pdf]

## Age is associated with time in therapeutic range for warfarin therapy in patients with atrial fibrillation

### Supplementary material

**Supplementary Table 1.** Multivariate linear regression analysis for TTR

| Variable                         | $\beta$ standardized coefficient | p value         |
|----------------------------------|----------------------------------|-----------------|
| Age                              | 0.120                            | <b>0.03</b>     |
| Sex (male)                       | 0.010                            | 0.84            |
| Self-declared race (White)       | 0.043                            | 0.42            |
| Body mass index                  | 0.061                            | 0.27            |
| Smoking                          | -0.016                           | 0.75            |
| Amiodarone use                   | -0.001                           | 0.98            |
| <i>CYP2C9</i> genotypes (IM+PM)  | -0.012                           | 0.81            |
| <i>VKORC1</i> genotypes          | 0.034                            | 0.52            |
| Alcohol                          | -0.050                           | 0.34            |
| Diabetes                         | -0.002                           | 0.97            |
| Hypertension                     | -0.024                           | 0.66            |
| Heart failure                    | 0.019                            | 0.72            |
| Hyperlipidemia                   | -0.059                           | 0.27            |
| Time in warfarin therapy (years) | 0.152                            | <b>&lt;0.01</b> |

**Supplementary Table 2.** Multivariate logistic regression analysis for over values of TTR median ( $\geq 68.0\%$ )

| Variables                        | OR   | 95% CI    | p value      |
|----------------------------------|------|-----------|--------------|
| $\geq 65$ years                  | 1.89 | 1.22-2.93 | <b>0.004</b> |
| Sex (male)                       | 1.35 | 0.88-2.07 | 0.17         |
| Self-declared race (White)       | 1.40 | 0.88-2.22 | 0.16         |
| Amiodarone use                   | 0.99 | 0.58-1.71 | 0.98         |
| <i>CYP2C9</i> genotypes (IM+PM)  | 1.10 | 0.69-1.77 | 0.68         |
| <i>VKORC1</i> genotypes          | 1.06 | 0.76-1.48 | 0.73         |
| Body mass index                  | 1.02 | 0.97-1.07 | 0.42         |
| Alcohol                          | 0.96 | 0.55-1.67 | 0.88         |
| Diabetes                         | 1.02 | 0.62-1.70 | 0.93         |
| Hypertension                     | 0.69 | 0.35-1.37 | 0.30         |
| Heart failure                    | 0.91 | 0.58-1.43 | 0.68         |
| Hyperlipidemia                   | 1.04 | 0.67-1.61 | 0.87         |
| Time in warfarin therapy (years) | 1.06 | 1.01-1.11 | <b>0.01</b>  |
